# Supplementary material for: A Digital Health Intervention for Concussion: Development and Clinical Feasibility Study
Source: PubMed Central journal article supplement (PMC9932878; doi:10.2196/43557), 2023-02-01
Supplement: formative_v7i1e43557_app1.pdf [file formative_v7i1e43557_app1.pdf]

## MULTIMEDIA APPENDIX 1

### Article:

d'Offay C, Ng XY, Alexander L, Grant A, Grahamslaw J, Pagliari C, Reed MJ, Carson A, Gillespie DC, Jamjoom AAB: A Digital Health Intervention for Concussion: Development and Clinical Feasibility Study. *JMIR Form Res* 2023;7:e43557

| Content                                                                                                                     | Page |
|-----------------------------------------------------------------------------------------------------------------------------|------|
| <b>Tables</b>                                                                                                               |      |
| S1: Barriers and facilitators identified from the scoping review mapped onto 7 domains relevant to HeadOn development       | 2    |
| S2: Behavioural analysis table                                                                                              | 7    |
| S3: Optimisation study 1 feedback results table                                                                             | 12   |
| S4: mHealth App Usability Questionnaire results table                                                                       | 13   |
| S5: Individual interviewee responses of barriers and facilitators mapped onto COM-B framework                               | 15   |
| S6: Qualitative interview feedback (including selected quotations) and associated changes to HeadOn                         | 17   |
| <b>Figures</b>                                                                                                              |      |
| S1: Flow diagram of HeadOn feasibility study design                                                                         | 20   |
| S2: Flow diagram of HeadOn feasibility study recruitment                                                                    | 21   |
| <b>Supplementary material</b>                                                                                               |      |
| S1: Search strategy for scoping review                                                                                      | 22   |
| S2: Preferred Reporting Items for Systematic reviews and Meta-Analyses extension for Scoping Reviews (PRISMA-ScR) Checklist | 24   |
| S3: Optimisation study 1 feedback questionnaire                                                                             | 27   |
| S4: CONSORT 2010 checklist of information to include when reporting a pilot or feasibility trial                            | 29   |
| S5: Schedule for qualitative interviews                                                                                     | 32   |
| S6: Consolidated criteria for reporting qualitative studies (COREQ)                                                         | 33   |

**Supplementary table 1:** Barriers and facilitators identified from the scoping review mapped onto 7 domains relevant to HeadOn development (reference list found in main article)

| Intervention characteristics   | Facilitators                                                                                                                                                                                                                                                                                                                                                                                                                                                                                                                                                                                                                                                                                                                                                                                                                                                                                                                                                                                                                                                                                                                                 | Barriers                                                                                                                                                                                                                                                                                                                                                                                                                                                                                                                                                                                                                                                                                                                                                                                                                                                                                                                                                                                           |
|--------------------------------|----------------------------------------------------------------------------------------------------------------------------------------------------------------------------------------------------------------------------------------------------------------------------------------------------------------------------------------------------------------------------------------------------------------------------------------------------------------------------------------------------------------------------------------------------------------------------------------------------------------------------------------------------------------------------------------------------------------------------------------------------------------------------------------------------------------------------------------------------------------------------------------------------------------------------------------------------------------------------------------------------------------------------------------------------------------------------------------------------------------------------------------------|----------------------------------------------------------------------------------------------------------------------------------------------------------------------------------------------------------------------------------------------------------------------------------------------------------------------------------------------------------------------------------------------------------------------------------------------------------------------------------------------------------------------------------------------------------------------------------------------------------------------------------------------------------------------------------------------------------------------------------------------------------------------------------------------------------------------------------------------------------------------------------------------------------------------------------------------------------------------------------------------------|
| <b>Intervention engagement</b> | <ul style="list-style-type: none"> <li>• Support from others with similar experiences [20-24]</li> <li>• Support networks (eg, return-to-work therapists, friends and family, and the government) [21,25,26]</li> <li>• Lack of social pressure and sense of anonymity as interventions do not involve face-to-face contact [27]</li> <li>• Interpersonal relationship with therapists [21,22,27,28]</li> <li>• Sense of duty or obligation to complete intervention [27]</li> <li>• Self-accountability for recovery [22,29,30]</li> <li>• Self-reflection on condition [21]</li> <li>• Open-minded attitude from the outset [30]</li> <li>• Trusted sources of information/advice at appropriate stage (ie, sports coaches before injury and health care professionals after injury) [26,31]</li> <li>• Belief that pros of the intervention outweigh the cons [30]</li> <li>• Open communication between stakeholders (eg, transparency between patients and employers and notification of schools by health care professionals) [21]</li> <li>• Interventions relieving some stress/responsibility from support networks [32]</li> </ul> | <ul style="list-style-type: none"> <li>• Lack of interaction among intervention participants [20]</li> <li>• Juggling of other commitments leading to lack of time or conflicts in scheduling [27,30]</li> <li>• Nonconcussion-related illness interfering with participation [29]</li> <li>• Inability to access normal social support network (eg, sports teams) [24]</li> <li>• Perceived source credibility [25,26]</li> <li>• Discrepancy in standard of care received for previous instances of concussion [26]</li> <li>• “Bad news” stories from other sources affecting expectations of recovery [25]</li> <li>• Lack of adequate support from support networks (eg, accommodations from employers and government disability grants) [21]</li> <li>• Failure to perceive long-term health consequences [22]</li> <li>• Poor communication between stakeholders leading to lack of accommodation in schools and workplaces [21]</li> <li>• Engagement requiring discipline [30]</li> </ul> |
| <b>Information</b>             | <ul style="list-style-type: none"> <li>• Passive discovery of information on popular media rather than actively seeking it out [26]</li> </ul>                                                                                                                                                                                                                                                                                                                                                                                                                                                                                                                                                                                                                                                                                                                                                                                                                                                                                                                                                                                               | <ul style="list-style-type: none"> <li>• Already knowing the information provided [20]</li> <li>• Surface-level information only [27]</li> </ul>                                                                                                                                                                                                                                                                                                                                                                                                                                                                                                                                                                                                                                                                                                                                                                                                                                                   |

|                               |                                                                                                                                                                                                                                                                                                                                                                                                                                                                                                                                                                                                                                                                                                                                                                                                                                                                                                                                  |                                                                                                                                                                                                                                                                                                                                                                                                                                                                                                                                                                                 |
|-------------------------------|----------------------------------------------------------------------------------------------------------------------------------------------------------------------------------------------------------------------------------------------------------------------------------------------------------------------------------------------------------------------------------------------------------------------------------------------------------------------------------------------------------------------------------------------------------------------------------------------------------------------------------------------------------------------------------------------------------------------------------------------------------------------------------------------------------------------------------------------------------------------------------------------------------------------------------|---------------------------------------------------------------------------------------------------------------------------------------------------------------------------------------------------------------------------------------------------------------------------------------------------------------------------------------------------------------------------------------------------------------------------------------------------------------------------------------------------------------------------------------------------------------------------------|
|                               | <p>Information about concussions:</p> <ul style="list-style-type: none"> <li>• Information focusing on symptoms and signs [20,23,29,32-34]</li> <li>• Information on potential risks and complications of concussions [20,23,31]</li> <li>• Typical course of recovery [22,32,34,35]</li> <li>• Methods of prevention [26]</li> <li>• Benefits of education [26]</li> <li>• Information on when to seek medical attention [20,29,33]</li> <li>• Risk factors for persistence of symptoms [22]</li> <li>• Information on concussion interventions: <ul style="list-style-type: none"> <li>• Sleep and rest [20,22,23,29,31-33]</li> <li>• Return to normal activities [20,22,23,29,31-33,35]</li> <li>• Symptom management techniques and strategies (including adaptive illness behaviors) [22,23,27-29,34-36]</li> <li>• Relaxation strategies [22,23,29,32,36]</li> <li>• Information on nutrition [29]</li> </ul> </li> </ul> | <ul style="list-style-type: none"> <li>• Too much repetitive information [37]</li> <li>• Inaccurate/outdated information [26]</li> <li>• Discrepancies in information received from different sources [22,25]</li> <li>• Variations in perceived severity of concussion [26]</li> <li>• Using differing terminologies for concussion [26]</li> <li>• Lacking preinjury education on concussion [26]</li> <li>• Lack of knowledge of available resources of information [26]</li> <li>• Mismatch between experience with concussion and the information provided [25]</li> </ul> |
| <b>Symptom monitoring</b>     | <ul style="list-style-type: none"> <li>• Provision of daily planners and concussion symptom scales [23,25,32]</li> <li>• Learning to accept uncertain timelines of symptom recovery [29]</li> <li>• Tracking can alert for the need to escalate care [37]</li> <li>• Feedback from others to gauge progress [25]</li> <li>• Screening by an occupational therapist to facilitate return to work [21]</li> </ul>                                                                                                                                                                                                                                                                                                                                                                                                                                                                                                                  | <ul style="list-style-type: none"> <li>• Information about symptoms not received early in recovery [23,26]</li> <li>• Placing onus for care on support networks (eg, parents and sports coaches) [26]</li> <li>• Lacking ecological validity when measuring symptoms in a controlled environment [25]</li> </ul>                                                                                                                                                                                                                                                                |
| <b>Lifestyle and behavior</b> | <ul style="list-style-type: none"> <li>• Gradual return to activity/sport [20,29]</li> <li>• Ability to plan own solutions to problems [27,38]</li> </ul>                                                                                                                                                                                                                                                                                                                                                                                                                                                                                                                                                                                                                                                                                                                                                                        | <ul style="list-style-type: none"> <li>• Absence of peer/sports team support [24]</li> <li>• Parental anxiety [24]</li> <li>• Low self-efficacy [26]</li> </ul>                                                                                                                                                                                                                                                                                                                                                                                                                 |

|                              |                                                                                                                                                                                                                                                                                                                                                                                                                                                                                                                                                                                                                                                                                                                    |                                                                                                                                                                                                                                                                                                                                                                                                                                                                                                                                                                                                                                                     |
|------------------------------|--------------------------------------------------------------------------------------------------------------------------------------------------------------------------------------------------------------------------------------------------------------------------------------------------------------------------------------------------------------------------------------------------------------------------------------------------------------------------------------------------------------------------------------------------------------------------------------------------------------------------------------------------------------------------------------------------------------------|-----------------------------------------------------------------------------------------------------------------------------------------------------------------------------------------------------------------------------------------------------------------------------------------------------------------------------------------------------------------------------------------------------------------------------------------------------------------------------------------------------------------------------------------------------------------------------------------------------------------------------------------------------|
|                              | <ul style="list-style-type: none"> <li>• Time-management skills [27]</li> <li>• Interpersonal skills [27,38]</li> <li>• Reducing smoking and drinking [27]</li> <li>• Regulation of symptom interference [28,38]</li> <li>• Personal finance management skills [27]</li> <li>• Web-based intervention not increasing time on the web more than usual [20]</li> </ul>                                                                                                                                                                                                                                                                                                                                               |                                                                                                                                                                                                                                                                                                                                                                                                                                                                                                                                                                                                                                                     |
| <b>Thoughts and emotions</b> | <ul style="list-style-type: none"> <li>• Satisfaction with intervention [20,22,23,27,29-33,35,37-39]</li> <li>• Lower levels of hypervigilance [27,38]</li> <li>• Ability to open up [27]</li> <li>• Lower stress levels [27,30,38]</li> <li>• Desire not to let down therapist [27]</li> <li>• Resolution and acceptance [28,38]</li> <li>• Empowerment and motivation [21,28,30]</li> <li>• Sense of control [28,30]</li> <li>• Reduced fear-avoidance of pain [39]</li> <li>• Improved mood [29,30]</li> <li>• Increased confidence regarding management of concussion [29]</li> <li>• Hope for recovery [29]</li> <li>• Internal belief in resilience and capability [25]</li> <li>• Reassured [31]</li> </ul> | <ul style="list-style-type: none"> <li>• Lazy [27]</li> <li>• Stressed [27]</li> <li>• Skepticism [26,27,30]</li> <li>• Bored during rest [24]</li> <li>• Isolated because of inability to access normal social networks [24,36]</li> <li>• Fear/uncertainty about process of returning to normal activity [24,25,29]</li> <li>• Lack of understanding [26]</li> <li>• Low self-efficacy [26]</li> <li>• Culture of resistance [26]</li> <li>• Self-conscious about the activity [30]</li> <li>• Memory issues/forgetfulness [25]</li> <li>• Anxiety about recovery [25]</li> <li>• Belief that full recovery is unachievable [21,22,25]</li> </ul> |
| <b>Design</b>                | <ul style="list-style-type: none"> <li>• Theory-/evidence-based content in keeping with best practices [20,23,26,32]</li> <li>• Ability to talk to a professional [20,27,30,37]</li> <li>• Time-efficient [27,30]</li> <li>• Simplicity [30]</li> <li>• Flexibility [22,27,35]</li> <li>• Safe [38]</li> <li>• Tailored [21,22,28,29,31]</li> </ul>                                                                                                                                                                                                                                                                                                                                                                | <ul style="list-style-type: none"> <li>• Lack of tailoring to phase of illness [20,23,27,31]</li> <li>• Lack of tailoring to particular population (eg, military personnel) [34]</li> <li>• Symptoms may interfere with willingness and capability to participate in intervention [30,35]</li> </ul>                                                                                                                                                                                                                                                                                                                                                |

|                          |                                                                                                                                                                                                                                                                                                                                                                                                                                                                                                                                                                                                                                                                                                                                                                                                                                                                  |                                                                                                                                                                                                                                                                                                                                                                                                                                                                                                                                                                                                                                 |
|--------------------------|------------------------------------------------------------------------------------------------------------------------------------------------------------------------------------------------------------------------------------------------------------------------------------------------------------------------------------------------------------------------------------------------------------------------------------------------------------------------------------------------------------------------------------------------------------------------------------------------------------------------------------------------------------------------------------------------------------------------------------------------------------------------------------------------------------------------------------------------------------------|---------------------------------------------------------------------------------------------------------------------------------------------------------------------------------------------------------------------------------------------------------------------------------------------------------------------------------------------------------------------------------------------------------------------------------------------------------------------------------------------------------------------------------------------------------------------------------------------------------------------------------|
|                          | <ul style="list-style-type: none"> <li>• Accessible and convenient [20,23,26-28,33]</li> <li>• Minimal contact/not in person [20,27,30,39]</li> <li>• Different types of educational resources (written/video) to suit participant preference or target certain populations [20,26,32,33]</li> <li>• Interesting/engaging [33,40]</li> <li>• Explicit framework (eg, regular scheduling of appointments) [22,25,27,29,39]</li> <li>• Appropriate frequency of intervention [27]</li> <li>• Low-cost or free [33,35]</li> <li>• Ecological validity of simulated paradigms [40]</li> <li>• Multidisciplinary interventions [21]</li> <li>• Ergonomic adaptations in patients' environment [21]</li> <li>• Involvement of support network within intervention [21,22,32]</li> <li>• Financial incentives for study participation and completion [39,40]</li> </ul> | <ul style="list-style-type: none"> <li>• Lack of face-to-face contact (absence of nonverbal cues and high value placed on personal contact with medical professionals) [27,35]</li> <li>• Varying preference for frequency of intervention sessions [27,36]</li> <li>• Interventions may cause symptom exacerbations [39]</li> <li>• Intensity of intervention not suitable [22,29,31]</li> <li>• Reading burden [34]</li> <li>• Not engaging enough [34]</li> <li>• Less regimented approach can make it harder to adhere to rehabilitation objectives [28]</li> <li>• Dislike of participating in phone calls [27]</li> </ul> |
| <b>Technical aspects</b> | <ul style="list-style-type: none"> <li>• Confidentiality and security of personal information [20,37]</li> <li>• Ability to track participant activity by use patterns [20,33,39]</li> <li>• Ability to set reminders and prompts [37,38,40]</li> <li>• Ability to facilitate a self-referral process [23]</li> <li>• Tangible tools and resources that can be accessed without limits [22,23,30,31,35,36]</li> <li>• Option of printing out resources [34]</li> <li>• Ability to generate automated alerts to clinical team [37]</li> </ul>                                                                                                                                                                                                                                                                                                                     | <ul style="list-style-type: none"> <li>• Technical issues [33,37,40]</li> <li>• Difficult to use [40]</li> <li>• Disruptions or distractions [30]</li> <li>• Lack of technology confidence or internet access [20,34,35,37]</li> <li>• Geographical, financial, and practical constraints [21,22,31,36]</li> <li>• Lack of trained staff [22]</li> </ul>                                                                                                                                                                                                                                                                        |

|  |                                                                                                                      |  |
|--|----------------------------------------------------------------------------------------------------------------------|--|
|  | <ul style="list-style-type: none"><li>• Ability to be implemented without extensive training of staff [32]</li></ul> |  |
|--|----------------------------------------------------------------------------------------------------------------------|--|

**Supplementary table 2:** Behavioural analysis table. BCW: Behavioural Change Wheel. BCT: Behaviour Change Taxonomy.

| Negative / Barrier                               | Feature                                                                                                                                                                                                                           | Target Construct BCW                                                             | Intervention Function BCW                   | Behaviour Change Technique (BCT - using 93 BCT taxonomy v1)                                                                   |
|--------------------------------------------------|-----------------------------------------------------------------------------------------------------------------------------------------------------------------------------------------------------------------------------------|----------------------------------------------------------------------------------|---------------------------------------------|-------------------------------------------------------------------------------------------------------------------------------|
| <b>Target behaviour: intervention engagement</b> |                                                                                                                                                                                                                                   |                                                                                  |                                             |                                                                                                                               |
| Memory issues / forgetfulness                    | Information on how to set up a routine around logging in<br><br>Information on setting the web-app to device homepage<br><br>Automated prompts to log-in<br><br>Regular reminders to support behaviour change in the intervention | Psychological capability<br><br>Physical opportunity<br><br>Automatic motivation | Education<br><br>Training<br><br>Persuasion | 4.1 Instruction on how to perform a behaviour<br><br>7.1 Prompts and cues<br><br>12.1. Restructuring the physical environment |
| Credibility of source                            | Meet the team section with description of experts involved in developing the intervention to boost credibility of the intervention                                                                                                | Automatic motivation                                                             | Persuasion                                  | 9.1 Credible source                                                                                                           |
| Lack of motivation                               | Information on the benefits of managing recovery<br><br>'Days in a row' toolbar displays number of consecutive days logged in and days missed.                                                                                    | Reflective motivation<br><br>Automatic motivation                                | Education<br><br>Incentivisation            | 5.1 Information about health consequences<br><br>10.4 Social reward                                                           |
| Lack of tailoring to concussion                  | Targeted information about concussion recovery                                                                                                                                                                                    | Reflective Motivation                                                            | Education                                   | 5.1 Information about health consequences                                                                                     |
| <b>Target behaviour: Symptom monitoring</b>      |                                                                                                                                                                                                                                   |                                                                                  |                                             |                                                                                                                               |

|                                                                       |                                                                                                                                                                                                                                                                                     |                                                                                                                                                |                                                                                                              |                                                                                                                                                                                      |
|-----------------------------------------------------------------------|-------------------------------------------------------------------------------------------------------------------------------------------------------------------------------------------------------------------------------------------------------------------------------------|------------------------------------------------------------------------------------------------------------------------------------------------|--------------------------------------------------------------------------------------------------------------|--------------------------------------------------------------------------------------------------------------------------------------------------------------------------------------|
| <p>Information provided is not suitable or contains discrepancies</p> | <p>Accurate information on symptoms and symptom management.</p> <p>Advice on when users may need to contact healthcare providers or emergency services.</p>                                                                                                                         | <p>Psychological capability</p> <p>Physical opportunity</p> <p>Reflective motivation</p> <p>Social opportunity</p>                             | <p>Education</p> <p>Persuasion</p> <p>Enablement</p>                                                         | <p>5.1 Information about health consequences</p> <p>9.1 Credible source</p> <p>3.1 Social support (unspecified)</p>                                                                  |
| <p>Lack of willingness</p>                                            | <p>Information on the benefits of symptom monitoring</p> <p>Allow users to view their symptom diary data</p> <p>Ability to record triggers in symptom diary</p> <p>Automated reminders to complete diary</p>                                                                        | <p>Reflective motivation</p> <p>Automatic motivation</p> <p>Physical opportunity</p>                                                           | <p>Enablement</p> <p>Persuasion</p>                                                                          | <p>5.1 Information about health consequences</p> <p>1.5 Review of behaviour goal</p> <p>4.2 Information about antecedents</p> <p>1.4 Action planning</p> <p>7.1 Prompts and cues</p> |
| <p>Lack of time</p>                                                   | <p>Flexible monitoring. Ability to input symptom diary daily at any time of day/ place convenient for user</p> <p>Automated reminders to complete diary</p> <p>Information on habit formation (i.e completing at the same time every day or associating with another activity).</p> | <p>Psychological capability</p> <p>Physical opportunity</p> <p>Social Opportunity</p> <p>Automatic motivation</p> <p>Reflective motivation</p> | <p>Education</p> <p>Training</p> <p>Environmental restructuring</p> <p>Enablement</p> <p>Incentivisation</p> | <p>4.1 Instructions on how to perform the behaviour</p> <p>7.1 Prompts and cues</p> <p>1.4 Action planning</p> <p>8.3 Habit formation</p>                                            |



|                                                                                                                                    |                                                                                                                                                                                                                                                                                                            |                                                                                                                    |                                                                                                               |                                                                                                                                                                                                                |
|------------------------------------------------------------------------------------------------------------------------------------|------------------------------------------------------------------------------------------------------------------------------------------------------------------------------------------------------------------------------------------------------------------------------------------------------------|--------------------------------------------------------------------------------------------------------------------|---------------------------------------------------------------------------------------------------------------|----------------------------------------------------------------------------------------------------------------------------------------------------------------------------------------------------------------|
| Lack of skills or ability                                                                                                          | <p>Easy navigation and visual system.</p> <p>Video instruction on how to use symptom diary</p>                                                                                                                                                                                                             | <p>Psychological capability</p> <p>Physical capability</p>                                                         | <p>Education</p> <p>Training</p> <p>Enablement</p>                                                            | <p>4.1 Instructions on how to perform the behaviour</p> <p>6.1 Demonstration of the behaviour</p>                                                                                                              |
| <b>Target behaviour: Adopt healthy lifestyle habits (good sleep hygiene, increased exercise, reduction in alcohol consumption)</b> |                                                                                                                                                                                                                                                                                                            |                                                                                                                    |                                                                                                               |                                                                                                                                                                                                                |
| Lack of motivation                                                                                                                 | <p>Information on the benefits of healthy habits in relation to concussion</p> <p>Prompts to record their alcohol consumption and automated alert when they have reached their maximum units of consumption for the week.</p> <p>Setting goals to perform exercise</p>                                     | <p>Reflective motivation</p> <p>Automatic motivation</p> <p>Social Opportunity</p>                                 | <p>Education</p> <p>Incentivisation</p> <p>Restriction</p>                                                    | <p>5.1 Information about health consequences</p> <p>9.1 Credible source</p> <p>7.1 Prompt and cues</p> <p>1.4 Action planning</p> <p>8.3 Habit formation</p>                                                   |
| Lack of knowledge                                                                                                                  | <p>Examples of types of exercise</p> <p>Information on recommended consumption of units of alcohol and how to count them</p> <p>Information on how to form habits. Set regular activity three times per week. Set alcohol free days.</p> <p>Instruction on setting up sleep routine and sleep hygiene.</p> | <p>Psychological capability</p> <p>Automatic motivation</p> <p>Reflective Motivation</p> <p>Social opportunity</p> | <p>Education</p> <p>Training</p> <p>Enablement</p> <p>Incentivisation</p> <p>Restriction</p> <p>Modelling</p> | <p>5.1 Information about health consequences</p> <p>1.1 Goal setting (behaviour)</p> <p>1.4 Action planning</p> <p>4.1 Instructions on how to perform the behaviour</p> <p>7.1 Prompts and cues</p> <p>8.1</p> |

|                                                                    |                                                                                                                                                                                                                           |                                                                                 |                                                               |                                                                                                         |
|--------------------------------------------------------------------|---------------------------------------------------------------------------------------------------------------------------------------------------------------------------------------------------------------------------|---------------------------------------------------------------------------------|---------------------------------------------------------------|---------------------------------------------------------------------------------------------------------|
|                                                                    |                                                                                                                                                                                                                           |                                                                                 |                                                               | Behavioural practice/rehearsal<br><br>8.3 Habit formation                                               |
| Fear or uncertainty about returning to normal activity levels      | Information on the benefits of healthy habits in relation to concussion                                                                                                                                                   | Psychological capability<br><br>Reflective motivation                           | Education<br><br>Training<br><br>Persuasion                   | 5.1 Information about health consequences                                                               |
| <b>Target behaviour: Address negative thoughts</b>                 |                                                                                                                                                                                                                           |                                                                                 |                                                               |                                                                                                         |
| Scepticism that a full recovery is unachievable after a concussion | Cognitive restructuring to recognise negative, inaccurate thoughts and replace them with alternative ones that are more realistic and helpful<br><br>Thought monitor to encourage reflection on thoughts about concussion | Psychological capability<br><br>Reflective motivation<br><br>Social opportunity | Education<br><br>Training<br><br>Persuasion<br><br>Enablement | 5.6 Information about emotional consequences<br><br>11.2 Reduce negative emotions<br><br>13.2 Reframing |
| Lack of motivation                                                 | Information on how concussion can affect your thoughts.                                                                                                                                                                   | Psychological capability<br><br>Reflective motivation                           | Education<br><br>Training                                     | 9.1 Credible source<br><br>5.6 Information about emotional consequences                                 |
| Stress                                                             | Breathing exercise to encourage relaxation                                                                                                                                                                                | Psychological capability<br><br>Physical opportunity                            | Education<br><br>Training<br><br>Environmental restructuring  | 12.6 Body changes                                                                                       |
| <b>Target behaviour: Goal setting</b>                              |                                                                                                                                                                                                                           |                                                                                 |                                                               |                                                                                                         |
| Lack of time                                                       | Information and advice on creating goals/ intentions<br><br>Automated reminders about set goals                                                                                                                           | Psychological capability                                                        | Education<br><br>Training                                     | 1.1 Goal setting (behaviour)<br><br>1.4 Action planning                                                 |

|                        |                                                                                      |                                                                                 |                                                                                     |                                                                                                                       |
|------------------------|--------------------------------------------------------------------------------------|---------------------------------------------------------------------------------|-------------------------------------------------------------------------------------|-----------------------------------------------------------------------------------------------------------------------|
|                        |                                                                                      |                                                                                 |                                                                                     | 7.1 Prompts and cues                                                                                                  |
| Lack of social support | Advice on sharing goals/intentions with support network<br><br>Review activity goals | Psychological capability<br><br>Reflective motivation<br><br>Social opportunity | Education<br><br>Training<br><br>Environmental restructuring<br><br>Incentivisation | 3.1 Social support (unspecified)<br><br>12.2 Restructuring the social environment<br><br>1.5 Review of behaviour goal |

**Supplementary table 3:** optimisation study 1 feedback results table (n=19)

|                           | <b>1 (Poor)</b> | <b>2 (Fair)</b> | <b>3 (Good)</b> | <b>4 (Very Good)</b> | <b>5 (Excellent)</b> |
|---------------------------|-----------------|-----------------|-----------------|----------------------|----------------------|
| <b>Overall concept</b>    | 0 (0%)          | 1 (5.3%)        | 4 (21.1%)       | 11 (57.9%)           | 3 (15.8%)            |
| <b>Symptom diary</b>      | 0 (0%)          | 0 (0%)          | 9 (47.4%)       | 7 (36.8%)            | 3 (15.8%)            |
| <b>Thought monitor</b>    | 0 (0%)          | 1 (5.3%)        | 10 (52.6%)      | 6 (31.6%)            | 2 (10.5%)            |
| <b>Symptom support</b>    | 0 (0%)          | 0 (0%)          | 5 (26.3%)       | 10 (52.6%)           | 4 (21.1%)            |
| <b>Progress report</b>    | 0 (0%)          | 0 (0%)          | 4 (21.1%)       | 10 (52.6%)           | 5 (26.3%)            |
| <b>Reading material</b>   | 0 (0%)          | 2 (10.5%)       | 7 (36.8%)       | 8 (42.1%)            | 2 (10.5%)            |
| <b>Breathing exercise</b> | 1 (5.3%)        | 0 (0%)          | 7 (36.8%)       | 8 (42.1%)            | 3 (15.8%)            |
| <b>Layout</b>             | 0 (0%)          | 1 (5.3%)        | 7 (36.8%)       | 8 (42.1%)            | 3 (15.8%)            |
| <b>Overall design</b>     | 0 (0%)          | 1 (5.3%)        | 7 (36.8%)       | 9 (47.4%)            | 2 (10.5%)            |

**Supplementary table 4: response to mHealth App Usability Questionnaire (n=29)**

|                                                                                                | 7<br>(agree)  | 6            | 5            | 4            | 3            | 2           | 1<br>(disagree) |
|------------------------------------------------------------------------------------------------|---------------|--------------|--------------|--------------|--------------|-------------|-----------------|
| <b>Ease of Use</b>                                                                             |               |              |              |              |              |             |                 |
| The app was easy to use                                                                        | 15<br>(51.7%) | 8<br>(27.6%) | 3<br>(10.3%) | 1<br>(3.5%)  | 2<br>(6.9%)  | 0 (0%)      | 0 (0%)          |
| It was easy for me to learn to use the app                                                     | 18<br>(62.1%) | 7<br>(24.1%) | 2<br>(6.9%)  | 0 (0%)       | 0 (0%)       | 2<br>(6.9%) | 0 (0%)          |
| I like the interface of the app                                                                | 15<br>(51.7%) | 6<br>(20.7%) | 5<br>(17.4%) | 1<br>(3.5%)  | 2<br>(6.9%)  | 0 (0%)      | 0 (0%)          |
| The information in the app was well organised, so I could easily find the information I needed | 19<br>(65.5%) | 5<br>(17.2%) | 4<br>(13.8%) | 0 (0%)       | 1<br>(3.5%)  | 0 (0%)      | 0 (0%)          |
| I feel comfortable using this app in social settings                                           | 14<br>(48.3%) | 7<br>(24.1%) | 1<br>(3.5%)  | 3<br>(10.3%) | 3<br>(10.3%) | 1<br>(3.5%) | 0 (0%)          |
| The amount of time involved in using this app has been fitting for me                          | 15<br>(51.7%) | 6<br>(20.7%) | 3<br>(10.3%) | 3<br>(10.3%) | 1<br>(3.5%)  | 1<br>(3.5%) | 0 (0%)          |
| I would use this app again                                                                     | 21<br>(72.4%) | 4<br>(13.8%) | 2<br>(6.9%)  | 2<br>(6.9%)  | 0 (0%)       | 0 (0%)      | 0 (0%)          |
| Overall, I am satisfied with this app                                                          | 17<br>(58.6%) | 3<br>(10.3%) | 6<br>(20.7%) | 3<br>(10.3%) | 0 (0%)       | 0 (0%)      | 0 (0%)          |
| <b>System information arrangement</b>                                                          |               |              |              |              |              |             |                 |
| Whenever I made a mistake using the app, I could recover easily and quickly                    | 8<br>(28.6%)  | 6<br>(21.4%) | 8<br>(28.6%) | 3<br>(10.7%) | 0 (0%)       | 1<br>(3.6%) | 2 (7.1%)        |
| This mHealth app provided an acceptable way to receive healthcare services                     | 15<br>(51.7%) | 7<br>(24.1%) | 3<br>(10.3%) | 3<br>(10.3%) | 0 (0%)       | 0 (0%)      | 1 (3.5%)        |
| The app adequately                                                                             | 16<br>(57.1%) | 4<br>(14.3%) | 6<br>(21.4%) | 1<br>(3.6%)  | 0 (0%)       | 0 (0%)      | 1 (3.6%)        |

|                                                                                                                                                             |               |              |              |              |             |        |          |
|-------------------------------------------------------------------------------------------------------------------------------------------------------------|---------------|--------------|--------------|--------------|-------------|--------|----------|
| acknowledged and provided information to let me know the progress of my actions                                                                             |               |              |              |              |             |        |          |
| The navigation was consistent when moving between screens                                                                                                   | 22<br>(78.6%) | 5<br>(17.9%) | 0 (0%)       | 0 (0%)       | 1<br>(3.6%) | 0 (0%) | 0 (0%)   |
| The interface of the app allowed me to use all the functions (such as entering information, responding to reminder, viewing information) offered by the app | 16<br>(57.1%) | 4<br>(14.3%) | 4<br>(14.3%) | 4<br>(14.3%) | 0 (0%)      | 0 (0%) | 0 (0%)   |
| This app has all the functions and capabilities I expect it to have                                                                                         | 15<br>(53.4%) | 4<br>(14.3%) | 6<br>(21.4%) | 2<br>(7.1%)  | 0 (0%)      | 0 (0%) | 1 (3.6%) |
| <b>Usefulness</b>                                                                                                                                           |               |              |              |              |             |        |          |
| The app would be useful for my health and well-being                                                                                                        | 19<br>(67.9%) | 4<br>(14.3%) | 4<br>(14.3%) | 1<br>(3.6%)  | 0 (0%)      | 0 (0%) | 0 (0%)   |
| The app improved my access to healthcare services                                                                                                           | 12<br>(42.9%) | 6<br>(21.4%) | 8<br>(28.6%) | 1<br>(3.6%)  | 0 (0%)      | 0 (0%) | 1 (3.6%) |
| The app helped me manage my health effectively                                                                                                              | 12<br>(44.4%) | 9<br>(33.3%) | 4<br>(14.8%) | 2<br>(7.4%)  | 0 (0%)      | 0 (0%) | 0 (0%)   |

**Supplementary table 5:** Individual interviewee responses of barriers and facilitators mapped onto COM-B framework

|                      |               |                                                         | Interview |   |   |   |   |   |   |   |   |    |    |    |    |    |    |   |
|----------------------|---------------|---------------------------------------------------------|-----------|---|---|---|---|---|---|---|---|----|----|----|----|----|----|---|
| Factors of influence |               |                                                         | 1         | 2 | 3 | 4 | 5 | 6 | 7 | 8 | 9 | 10 | 11 | 12 | 13 | 14 | 15 |   |
| Capability           | Physical      | Difficulty registering due to symptom burden            |           |   |   |   |   | x | x |   |   | x  |    |    |    |    |    |   |
|                      |               | Difficulty with screens / devices due to symptom burden |           |   | x |   |   | x |   |   |   |    |    |    |    |    | x  |   |
|                      |               | Audio or text files                                     | x         | x |   |   | x | x |   |   | x | x  |    | x  | x  | x  | x  |   |
|                      | Psychological | Clear Instructions / Easy to use                        | x         |   | x | x |   | x | x | x |   |    | x  | x  |    | x  |    | x |
|                      |               | Forgetfulness / Memory                                  | x         | x | x | x |   | x | x | x | x | x  | x  | x  | x  | x  |    |   |
|                      |               | Difficulty locating and log-in / Not native app         | x         |   |   |   |   | x |   | x |   |    | x  | x  | x  |    |    |   |
|                      |               | Build into routine / Set own reminder                   |           | x |   | x |   | x | x |   |   |    | x  | x  | x  | x  |    |   |
|                      |               | Staggered weekly content / Tasks                        | x         |   |   | x |   | x | x | x |   |    |    |    | x  |    | x  |   |
|                      |               |                                                         |           |   |   |   |   |   |   |   |   |    |    |    |    |    |    |   |
| Opportunity          | Social        | Family / network support                                | x         | x |   | x |   | x |   | x | x |    | x  |    |    |    |    |   |
|                      |               | Work or other commitments                               |           |   |   |   |   |   |   | x |   |    |    |    |    | x  | x  | x |
|                      | Physical      | Adding website to device home-screen                    |           |   |   |   |   |   | x | x |   |    |    |    |    |    | x  |   |
|                      |               | Alcohol tracker – accidental addition of units          | x         | x | x | x |   |   |   | x |   | x  | x  | x  | x  |    |    |   |
|                      |               | Flexibility of digital and self-directed                |           | x | x |   | x | x | x | x |   |    |    | x  | x  | x  |    | x |
|                      |               | Prompts and reminders supported engagement              | x         | x |   | x | x |   | x | x | x |    |    |    | x  | x  |    | x |
|                      |               | Pandemic increased digital                              |           |   |   |   |   |   |   |   |   |    |    | x  | x  |    |    |   |

|                   |                   |                                                                          |   |   |   |   |   |   |   |   |   |   |   |   |   |   |   |   |
|-------------------|-------------------|--------------------------------------------------------------------------|---|---|---|---|---|---|---|---|---|---|---|---|---|---|---|---|
|                   |                   | skills / competence                                                      |   |   |   |   |   |   |   |   |   |   |   |   |   |   |   |   |
| <b>Motivation</b> | <b>Reflective</b> | Language used in thought monitor                                         | x | x |   | x |   | x |   | x |   | x | x |   | x |   |   |   |
|                   |                   | Being part of an academic study / committing                             |   |   | x | x | x | x | x |   |   |   | x |   | x | x |   |   |
|                   |                   | Ability to review progress / symptom diary                               | x | x | x |   |   | x | x | x |   | x | x | x |   |   |   |   |
|                   |                   | Credible source                                                          | x | x |   |   |   | x | x | x |   |   |   |   |   |   |   |   |
|                   |                   | Belief intervention supported recovery                                   | x |   |   |   |   |   |   |   |   |   | x | x |   |   |   |   |
|                   | <b>Automatic</b>  | Feedback; Days in row progress                                           |   |   |   |   |   |   |   |   |   | x |   | x |   |   |   |   |
|                   |                   | Built into routine / Set own reminder                                    |   | x |   | x |   | x | x |   |   | x | x | x | x |   |   |   |
|                   |                   | High symptom burden                                                      | x |   | x |   |   |   |   |   | x |   | x | x |   |   |   |   |
|                   |                   | Increased personalisation/ tailoring                                     |   |   | x | x |   | x |   |   |   |   |   | x |   |   |   |   |
|                   |                   | Low symptom burden (10-14 days symptoms improved and engagement reduced) | x |   | x | x |   |   |   |   |   |   |   |   |   |   | x | x |
|                   |                   | Repetitive task                                                          |   |   |   |   |   |   | x |   |   |   |   | x |   | x |   |   |



**Supplementary table 6:** Qualitative interview feedback (including selected quotations) and associated changes to HeadOn

| Intervention feedback                                                                                                                                                                                                                                                                                      | Participant quote                                                                                                                                                                                                                                                                                                                                                                          | Changes to be made to HeadOn                                                                 |
|------------------------------------------------------------------------------------------------------------------------------------------------------------------------------------------------------------------------------------------------------------------------------------------------------------|--------------------------------------------------------------------------------------------------------------------------------------------------------------------------------------------------------------------------------------------------------------------------------------------------------------------------------------------------------------------------------------------|----------------------------------------------------------------------------------------------|
| <p>Memory loss and forgetfulness were reported as major symptoms by participants. Participants said that they needed further support to remember to engage with the intervention. Many participants cited being prompted to log-in after receiving the weekly email.</p>                                   | <p>“Try to do it every day, well of course with the concussion as well I’ve sort of been quite forgetful, that’s been part of it as well.”</p> <p>“Well, when I remember, I try to do it every night, try to set myself some time to remember every night, but sometimes forget, I generally try. I would say 5 times a week I’m managing.”</p>                                            | <p>Increased number of emails and notifications to support memory and enhance engagement</p> |
| <p>Many participants complained of the sensitivity of the alcohol tracker. This meant that they accidentally added units they did not consume. The feature did not have a minus button so participants were unable to correct the mistake. Participants reported being frustrated and annoyed by this.</p> | <p>“Yeah, and with the alcohol tracker, um, it I was expecting a number to come up with the amount of alcohol I was supposed to have consumed today, so a wheel that you would hit, and a number would of come up with the number you had hit, drank that day. And I kept pressing it, looking for it, and it come up that I’d drunk 25 units of alcohol and I’d actually drunk none.”</p> | <p>Addition of a minus button to the alcohol tracker.</p>                                    |
| <p>Participants that built a routine around logging into the intervention, for example at the same time every day or with other medication were more successful at engaging with the intervention every day.</p>                                                                                           | <p>“I usually do it in the afternoon, because what I found, some of the times I missed it, it was the evening, and then we sat down to watch TV and I forgot about it. So mid-to late afternoon, is the easiest time to do it for me.”</p> <p>“Really was as part of a routine. I had it on my laptop and would log into my laptop once a day and</p>                                      | <p>Provide information about the benefits of setting a routine.</p>                          |

|                                                                                                                                                                                                                                                                                                                                |                                                                                                                                                                                                                                                                                                                                                                 |                                                                                                                                                                                                 |
|--------------------------------------------------------------------------------------------------------------------------------------------------------------------------------------------------------------------------------------------------------------------------------------------------------------------------------|-----------------------------------------------------------------------------------------------------------------------------------------------------------------------------------------------------------------------------------------------------------------------------------------------------------------------------------------------------------------|-------------------------------------------------------------------------------------------------------------------------------------------------------------------------------------------------|
|                                                                                                                                                                                                                                                                                                                                | as part of that I would checking my emails, doing other things, I would do it as part of that process.”                                                                                                                                                                                                                                                         |                                                                                                                                                                                                 |
| Participants that set their own reminders to log-in were more successful at logging in and engaging with the intervention                                                                                                                                                                                                      | “Every single day or every second day, the longest period I went without was like 3 days. But I set reminders on my phone now to make sure I do it that day.”                                                                                                                                                                                                   | Provide information about the benefits of setting reminders and instruction on how to set a reminder.                                                                                           |
| Participants who saved the intervention to their device home screen, found logging in easier and were more successful at engaging regularly. Participants who did not found it difficult to remember how to log-in and some had a lengthier process for logging in, for example searching in the email for the link.           | “I know it isn’t an app but it was saved to my home screen, so I was able to see it there and I was able to remember to go into it.”                                                                                                                                                                                                                            | Include an automated add to home-screen button and information on the benefits of saving the intervention to the device home-screen.                                                            |
| Many participants stated that they were unable to remember the incident which they got their injury. They found the thought monitor activity challenging because of this. Whilst the thought monitor was designed for reflection on general concussion and recovery, many participants understood it to focus on the incident. | “think it was the most recent one, you had to like write more, it was more than multiple choice. You had to write out a wee thing about how you were feeling and it was just like the same question, but I couldn’t really write about what had happened because it’s just what people had told me. So I felt a bit useless. I couldn’t fill it out that well.” | Review and edit the language in the thought monitor.                                                                                                                                            |
| Difficulty with registering and using intervention in first few days after injury, due to high symptom burden. Capacity to use screens and focus reduced. Needed social support to register and use app                                                                                                                        | “there are people like me who are kind of struggling with computer screens and staying of computer and social media in the immediate period after their head injury, and you know that is a little bit of an issue.”                                                                                                                                            | Streamline the registration process to make it easier to do. Sign post users to the audio clips to allow alternative means of consuming HeadOn information without the need to look at a screen |

|  |                                                                                                                                                                                                                                                                                                                                                                    |  |
|--|--------------------------------------------------------------------------------------------------------------------------------------------------------------------------------------------------------------------------------------------------------------------------------------------------------------------------------------------------------------------|--|
|  | <p>“Accept that in the first few days I couldn’t look at a screen and had difficulty reading and wasn’t a very easy format to engage with... so it would have been better if they sent it to a partner and they could of said ‘do you want to sign up for this?’ You know they know my name. I think it would have been more effective to send it to someone.”</p> |  |
|--|--------------------------------------------------------------------------------------------------------------------------------------------------------------------------------------------------------------------------------------------------------------------------------------------------------------------------------------------------------------------|--|

**Supplementary figure 1: flow diagram of HeadOn feasibility study design**

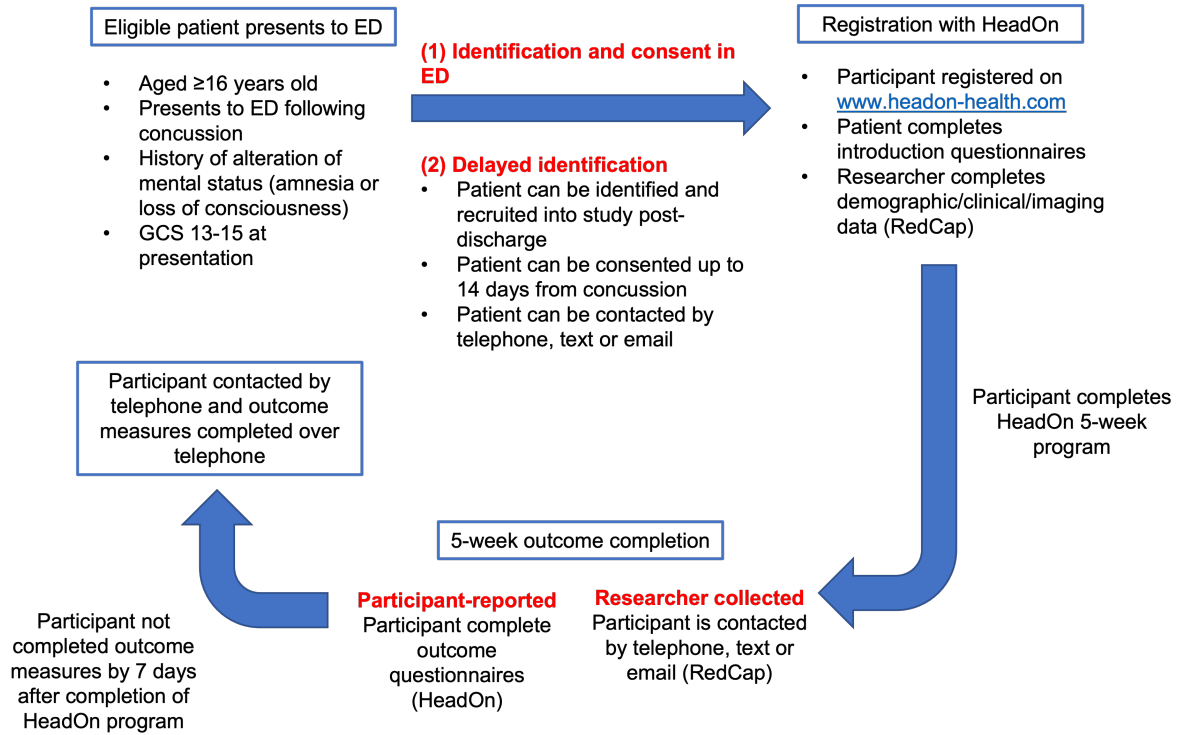

**Supplementary figure 2:** flow diagram of HeadOn feasibility study recruitment

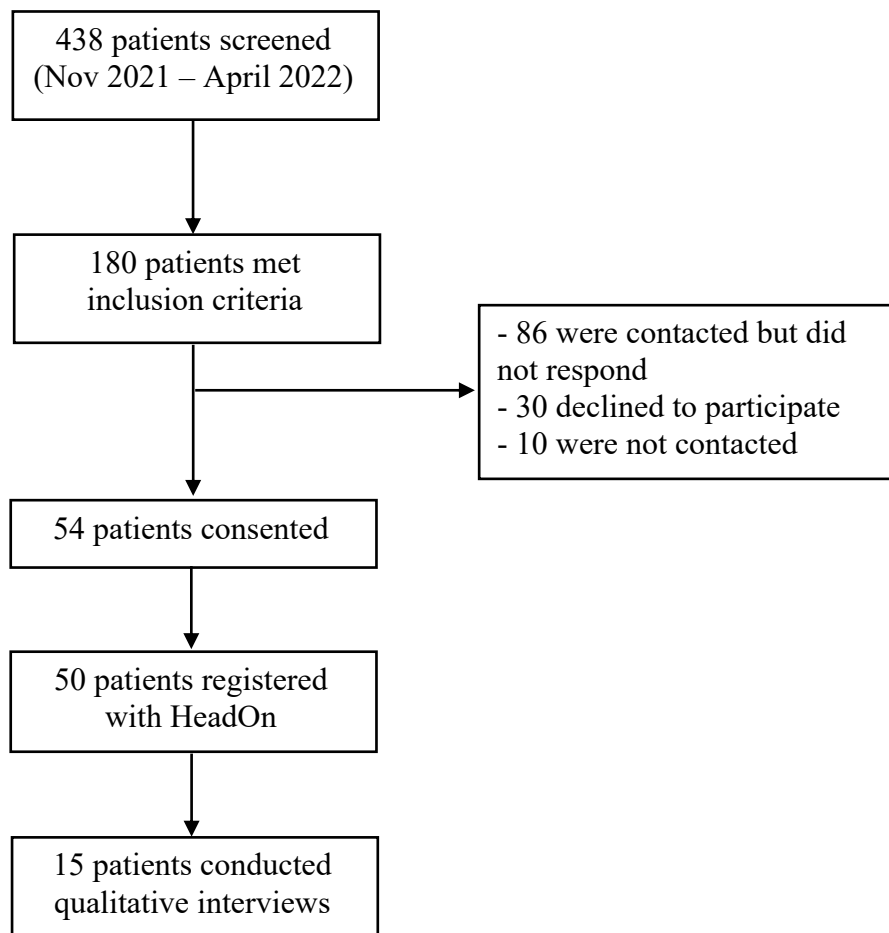

**Supplementary material 1:** search strategy for scoping review

| Database                                   | Search strategy                                                                                                                                                                                                                                                                                                                                                                                                                                                                                                                                                                                                                                                                                                                                                                                                                                                                                                                                                                                                                                                                                                                                                                                                                                                                                             | Hits                                          |
|--------------------------------------------|-------------------------------------------------------------------------------------------------------------------------------------------------------------------------------------------------------------------------------------------------------------------------------------------------------------------------------------------------------------------------------------------------------------------------------------------------------------------------------------------------------------------------------------------------------------------------------------------------------------------------------------------------------------------------------------------------------------------------------------------------------------------------------------------------------------------------------------------------------------------------------------------------------------------------------------------------------------------------------------------------------------------------------------------------------------------------------------------------------------------------------------------------------------------------------------------------------------------------------------------------------------------------------------------------------------|-----------------------------------------------|
| MEDLINE(Ovid) and Cochrane Library (Wiley) | <ol style="list-style-type: none"> <li>1) exp Brain Concussion/rh, th [Rehabilitation, Therapy]</li> <li>2) exp Post-Concussion Syndrome/rh, th [Rehabilitation, Therapy]</li> <li>3) (mild traumatic brain injury or mTBI or mild head injury).ti,ab,id.</li> <li>4) exp Craniocerebral Trauma/rh, th [Rehabilitation, Therapy]</li> <li>5) 1 or 2 or 3 or 4</li> <li>6) exp Self-Management/ or exp Self Care/</li> <li>7) exp Exercise Therapy/ or exp “Physical and Rehabilitation Medicine”/</li> <li>8) exp Health Education/ or exp Patient Education as Topic/ or exp Consumer Health information/</li> <li>9) (psychoeducation or intervention).ti,ab,id.</li> <li>10) exp Behavior Therapy/ or exp Cognitive Behavioral Therapy/ or exp Counseling/mt [Methods] or exp Psychotherapy/th [Therapy]</li> <li>11) exp Bed Rest/</li> <li>12) 6 or 7 or 8 or 9 or 10 or 11</li> <li>13) (“semi-structured” or semistructured or unstructured or informal or “in-depth” or indepth or “face-to-face” or structured or guide) adj3 (interview* or discussion* or questionnaire*).ti,ab.</li> <li>14) exp Interviews as Topic/mt, px [Methods, Psychology] or exp Focus Groups/mt [Methods] or exp Narration/ or exp Qualitative Research/</li> <li>15) 13 or 14</li> <li>16) 5 and 12 and 15</li> </ol> | <p>MEDLINE:<br/>113<br/>Cochrane:<br/>109</p> |
| PsycInfo (APA)                             | <ol style="list-style-type: none"> <li>1) (post-concussi* or postconcussi*).ti,ab.</li> <li>2) (mild traumatic brain injury or mTBI or mild head injury).ti,ab.</li> <li>3) brain concussion/</li> <li>4) 1 or 2 or 3</li> <li>5) self-management/ or self care/</li> <li>6) rehabilitation/ or physical therapy/ or exercise/ or movement therapy/ or “rest”</li> <li>7) health education/ or health knowledge/ or health literacy/ or health promotion/ or psychoeducation/</li> <li>8) psychotherapy/ or psychotherapeutic counselling/ or psychotherapeutic</li> </ol>                                                                                                                                                                                                                                                                                                                                                                                                                                                                                                                                                                                                                                                                                                                                  | <p>35</p>                                     |

|        |                                                                                                                                                                                                                                                                                                                                                                                                                                                                                                                                                                                                                                                                                                                                                                                                                       |     |
|--------|-----------------------------------------------------------------------------------------------------------------------------------------------------------------------------------------------------------------------------------------------------------------------------------------------------------------------------------------------------------------------------------------------------------------------------------------------------------------------------------------------------------------------------------------------------------------------------------------------------------------------------------------------------------------------------------------------------------------------------------------------------------------------------------------------------------------------|-----|
|        | <p>techniques/ or strategic therapy/ or online therapy</p> <p>9) cognitive behavior therapy/ or cognitive rehabilitation/ or neuropsychological rehabilitation/ or (“behavio* therapy” or “cognitive therapy”).ti,ab.</p> <p>10) 5 or 6 or 7 or 8 or 9</p> <p>11) (“semi-structured” or semistructured or unstructured or informal or “in-depth” or indepth or “face-to-face” or structured or guide or guides) adj3 (interview* or discussion* or questionnaire*).ti,ab,id.</p> <p>12) (focus group* or qualitative or ethnograph* or fieldwork or “field work” or “key informant”).ti,ab,id.</p> <p>13) qualitative research/ or interviews/ or group discussion/ or qualitative study.md. or experiences.tw. or interview.tw. or qualitative.tw.</p> <p>14) 11 or 12 or 13</p> <p>15) 4 and 10 and 14</p>          |     |
| Scopus | <p>1) TITLE-ABS(post-concussi* or postconcussi* or "mild traumatic brain injury" or mTBI or "mild head injury" or "concussion")</p> <p>2) TITLE-ABS-KEY (“self*management” OR “self*care” OR exercise OR "exercise therap*" OR "physical therap*" OR rehabilitation OR intervention OR "health education" OR "patient education" OR psychoeducation OR "cognitive behavi* therapy" OR cbt OR "behavi* therap*" OR "cognitive therap*" OR "counsel*" OR "rest" )</p> <p>3) TITLE-ABS-KEY ( "semi-structured" OR semistructured OR unstructured OR informal OR "in-depth" OR indepth OR "face-to-face" OR structured OR guide OR guides OR interview* OR discussion* OR questionnaire* OR "focus group*" OR qualitative OR ethnograph* OR fieldwork OR "field work" OR "key informant" )</p> <p>4) #1 and #2 and #3</p> | 731 |

**Supplementary material 2:** Preferred Reporting Items for Systematic reviews and Meta-Analyses extension for Scoping Reviews (PRISMA-ScR) Checklist

| SECTION                   | ITEM | PRISMA-ScR CHECKLIST ITEM                                                                                                                                                                                                                                                 | REPORTED ON PAGE #                                |
|---------------------------|------|---------------------------------------------------------------------------------------------------------------------------------------------------------------------------------------------------------------------------------------------------------------------------|---------------------------------------------------|
| <b>TITLE</b>              |      |                                                                                                                                                                                                                                                                           |                                                   |
| Title                     | 1    | Identify the report as a scoping review.                                                                                                                                                                                                                                  | Page 2                                            |
| <b>ABSTRACT</b>           |      |                                                                                                                                                                                                                                                                           |                                                   |
| Structured summary        | 2    | Provide a structured summary that includes (as applicable): background, objectives, eligibility criteria, sources of evidence, charting methods, results, and conclusions that relate to the review questions and objectives.                                             | n/a the ScR was small part of larger body of work |
| <b>INTRODUCTION</b>       |      |                                                                                                                                                                                                                                                                           |                                                   |
| Rationale                 | 3    | Describe the rationale for the review in the context of what is already known. Explain why the review questions/objectives lend themselves to a scoping review approach.                                                                                                  | Page 4                                            |
| Objectives                | 4    | Provide an explicit statement of the questions and objectives being addressed with reference to their key elements (e.g., population or participants, concepts, and context) or other relevant key elements used to conceptualize the review questions and/or objectives. | Pages 4 and 6                                     |
| <b>METHODS</b>            |      |                                                                                                                                                                                                                                                                           |                                                   |
| Protocol and registration | 5    | Indicate whether a review protocol exists; state if and where it can be accessed (e.g., a Web address); and if available, provide registration information, including the registration number.                                                                            | As sub-study protocol not registered              |
| Eligibility criteria      | 6    | Specify characteristics of the sources of evidence used as eligibility criteria (e.g., years considered, language, and publication status), and provide a rationale.                                                                                                      | Page 6                                            |
| Information sources*      | 7    | Describe all information sources in the search (e.g., databases with dates of coverage and contact with authors to identify additional sources), as well as the date the most recent search was executed.                                                                 | Page 6                                            |
| Search                    | 8    | Present the full electronic search strategy for at least 1 database, including any limits used, such that it could be repeated.                                                                                                                                           | Page 6                                            |



| SECTION                                               | ITEM | PRISMA-ScR CHECKLIST ITEM                                                                                                                                                                                                                                                                                  | REPORTED ON PAGE # |
|-------------------------------------------------------|------|------------------------------------------------------------------------------------------------------------------------------------------------------------------------------------------------------------------------------------------------------------------------------------------------------------|--------------------|
| Selection of sources of evidence†                     | 9    | State the process for selecting sources of evidence (i.e., screening and eligibility) included in the scoping review.                                                                                                                                                                                      | Page 6             |
| Data charting process‡                                | 10   | Describe the methods of charting data from the included sources of evidence (e.g., calibrated forms or forms that have been tested by the team before their use, and whether data charting was done independently or in duplicate) and any processes for obtaining and confirming data from investigators. | na                 |
| Data items                                            | 11   | List and define all variables for which data were sought and any assumptions and simplifications made.                                                                                                                                                                                                     | Page 6             |
| Critical appraisal of individual sources of evidence§ | 12   | If done, provide a rationale for conducting a critical appraisal of included sources of evidence; describe the methods used and how this information was used in any data synthesis (if appropriate).                                                                                                      | na                 |
| Synthesis of results                                  | 13   | Describe the methods of handling and summarizing the data that were charted.                                                                                                                                                                                                                               | Page 6             |
| <b>RESULTS</b>                                        |      |                                                                                                                                                                                                                                                                                                            |                    |
| Selection of sources of evidence                      | 14   | Give numbers of sources of evidence screened, assessed for eligibility, and included in the review, with reasons for exclusions at each stage, ideally using a flow diagram.                                                                                                                               | Figure 1           |
| Characteristics of sources of evidence                | 15   | For each source of evidence, present characteristics for which data were charted and provide the citations.                                                                                                                                                                                                | Table 1            |
| Critical appraisal within sources of evidence         | 16   | If done, present data on critical appraisal of included sources of evidence (see item 12).                                                                                                                                                                                                                 | na                 |
| Results of individual sources of evidence             | 17   | For each included source of evidence, present the relevant data that were charted that relate to the review questions and objectives.                                                                                                                                                                      | na                 |
| Synthesis of results                                  | 18   | Summarize and/or present the charting results as they relate to the review questions and objectives.                                                                                                                                                                                                       | Table 1            |
| <b>DISCUSSION</b>                                     |      |                                                                                                                                                                                                                                                                                                            |                    |
| Summary of evidence                                   | 19   | Summarize the main results (including an overview of concepts, themes, and types of evidence available), link to the review questions and objectives, and consider the relevance to key groups.                                                                                                            | Page 29            |

| SECTION        | ITEM | PRISMA-ScR CHECKLIST ITEM                                                                                                                                                       | REPORTED ON PAGE #                                             |
|----------------|------|---------------------------------------------------------------------------------------------------------------------------------------------------------------------------------|----------------------------------------------------------------|
| Limitations    | 20   | Discuss the limitations of the scoping review process.                                                                                                                          | As part of broader piece of research limitations not discussed |
| Conclusions    | 21   | Provide a general interpretation of the results with respect to the review questions and objectives, as well as potential implications and/or next steps.                       | Page 32                                                        |
| <b>FUNDING</b> |      |                                                                                                                                                                                 |                                                                |
| Funding        | 22   | Describe sources of funding for the included sources of evidence, as well as sources of funding for the scoping review. Describe the role of the funders of the scoping review. | Page 33                                                        |

## HEADON FEEDBACK QUESTIONNAIRE

*We would like your views to help us develop a new mobile application to help people manage their symptoms after a head injury. This survey will only take you a few minutes and any additional comments you would like to make would be greatly appreciated. Thank you for taking time to complete this survey.*

**1. Have you used mobile apps to manage your health?**

Yes                       No

**2. Please rate the following app features:**

|                           | 1 (Poor) | 2 (Fair) | 3 (Good) | 4 (Very Good) | 5 (Excellent) |
|---------------------------|----------|----------|----------|---------------|---------------|
| <i>Symptom diary</i>      |          |          |          |               |               |
| <i>Thought matrix</i>     |          |          |          |               |               |
| <i>Symptom support</i>    |          |          |          |               |               |
| <i>Progress report</i>    |          |          |          |               |               |
| <i>Reading material</i>   |          |          |          |               |               |
| <i>Breathing exercise</i> |          |          |          |               |               |
| <i>Layout</i>             |          |          |          |               |               |
| <i>Overall design</i>     |          |          |          |               |               |

**3. Would you be willing to input information about your symptoms if you were to use an app like this?**

Yes                       No                       Unsure

**4. How useful do think the app is for the purpose intended?**

Not useful at all                       Not so useful                       Somewhat useful   
 Very useful                       Extremely useful

**5. What length of programme would you be able to complete if you were to use an app like this?**

1 week                       2 weeks                       3 weeks                       4 weeks

**6. How much would you be willing to pay for this app?**

**7. Would you use this app?**

Yes

No

**8. Would you recommend this app to other people who have had a head injury?**

Definitely not

Probably not

Don't know

Probably

Definitely

**9. Do you have any further comments about the app, or suggestions as to how it could be improved?**

***Thank you for taking the time to complete this survey***

**Supplementary material 4: CONSORT 2010 checklist of information to include when reporting a pilot or feasibility trial**

| Section/Topic                    | Item No | Checklist item                                                                                                                                                                              | Reported on page No |
|----------------------------------|---------|---------------------------------------------------------------------------------------------------------------------------------------------------------------------------------------------|---------------------|
| <b>Title and abstract</b>        |         |                                                                                                                                                                                             |                     |
|                                  | 1a      | Identification as a pilot or feasibility randomised trial in the title                                                                                                                      | 1                   |
|                                  | 1b      | Structured summary of pilot trial design, methods, results, and conclusions (for specific guidance see CONSORT abstract extension for pilot trials)                                         | 2                   |
| <b>Introduction</b>              |         |                                                                                                                                                                                             |                     |
| Background and objectives        | 2a      | Scientific background and explanation of rationale for future definitive trial, and reasons for randomised pilot trial                                                                      | 4/5                 |
|                                  | 2b      | Specific objectives or research questions for pilot trial                                                                                                                                   | 4/5                 |
| <b>Methods</b>                   |         |                                                                                                                                                                                             |                     |
| Trial design                     | 3a      | Description of pilot trial design (such as parallel, factorial) including allocation ratio                                                                                                  | 8/9                 |
|                                  | 3b      | Important changes to methods after pilot trial commencement (such as eligibility criteria), with reasons                                                                                    | n/a                 |
| Participants                     | 4a      | Eligibility criteria for participants                                                                                                                                                       | 8                   |
|                                  | 4b      | Settings and locations where the data were collected                                                                                                                                        | 8/9                 |
|                                  | 4c      | How participants were identified and consented                                                                                                                                              | 8                   |
| Interventions                    | 5       | The interventions for each group with sufficient details to allow replication, including how and when they were actually administered                                                       | 8                   |
| Outcomes                         | 6a      | Completely defined prespecified assessments or measurements to address each pilot trial objective specified in 2b, including how and when they were assessed                                | 8/9                 |
|                                  | 6b      | Any changes to pilot trial assessments or measurements after the pilot trial commenced, with reasons                                                                                        | n/a                 |
|                                  | 6c      | If applicable, prespecified criteria used to judge whether, or how, to proceed with future definitive trial                                                                                 | n/a                 |
| Sample size                      | 7a      | Rationale for numbers in the pilot trial                                                                                                                                                    | n/a                 |
|                                  | 7b      | When applicable, explanation of any interim analyses and stopping guidelines                                                                                                                | n/a                 |
| Randomisation:                   |         |                                                                                                                                                                                             |                     |
| Sequence generation              | 8a      | Method used to generate the random allocation sequence                                                                                                                                      | n/a                 |
|                                  | 8b      | Type of randomisation(s); details of any restriction (such as blocking and block size)                                                                                                      | n/a                 |
| Allocation concealment mechanism | 9       | Mechanism used to implement the random allocation sequence (such as sequentially numbered containers), describing any steps taken to conceal the sequence until interventions were assigned | n/a                 |

|                                                      |     |                                                                                                                                                                                       |                                |
|------------------------------------------------------|-----|---------------------------------------------------------------------------------------------------------------------------------------------------------------------------------------|--------------------------------|
| Implementation                                       | 10  | Who generated the random allocation sequence, who enrolled participants, and who assigned participants to interventions                                                               | n/a                            |
| Blinding                                             | 11a | If done, who was blinded after assignment to interventions (for example, participants, care providers, those assessing outcomes) and how                                              | n/a                            |
|                                                      | 11b | If relevant, description of the similarity of interventions                                                                                                                           | n/a                            |
| Statistical methods                                  | 12  | Methods used to address each pilot trial objective whether qualitative or quantitative                                                                                                | This was a mixed methods study |
| <b>Results</b>                                       |     |                                                                                                                                                                                       |                                |
| Participant flow (a diagram is strongly recommended) | 13a | For each group, the numbers of participants who were approached and/or assessed for eligibility, randomly assigned, received intended treatment, and were assessed for each objective | Supplementary material 16      |
|                                                      | 13b | For each group, losses and exclusions after randomisation, together with reasons                                                                                                      | Supplementary material 16      |
| Recruitment                                          | 14a | Dates defining the periods of recruitment and follow-up                                                                                                                               | 8                              |
|                                                      | 14b | Why the pilot trial ended or was stopped                                                                                                                                              | 8                              |
| Baseline data                                        | 15  | A table showing baseline demographic and clinical characteristics for each group                                                                                                      | 20/21                          |
| Numbers analysed                                     | 16  | For each objective, number of participants (denominator) included in each analysis. If relevant, these numbers should be by randomised group                                          | 21/22                          |
| Outcomes and estimation                              | 17  | For each objective, results including expressions of uncertainty (such as 95% confidence interval) for any estimates. If relevant, these results should be by randomised group        | 21/22                          |
| Ancillary analyses                                   | 18  | Results of any other analyses performed that could be used to inform the future definitive trial                                                                                      | n/a                            |
| Harms                                                | 19  | All important harms or unintended effects in each group (for specific guidance see CONSORT for harms)                                                                                 | 20                             |
|                                                      | 19a | If relevant, other important unintended consequences                                                                                                                                  | n/a                            |
| <b>Discussion</b>                                    |     |                                                                                                                                                                                       |                                |
| Limitations                                          | 20  | Pilot trial limitations, addressing sources of potential bias and remaining uncertainty about feasibility                                                                             | 31/32                          |
| Generalisability                                     | 21  | Generalisability (applicability) of pilot trial methods and findings to future definitive trial and other studies                                                                     | 32                             |
| Interpretation                                       | 22  | Interpretation consistent with pilot trial objectives and findings, balancing potential benefits and harms, and considering other relevant evidence                                   | 29/30                          |

|                          |     |                                                                                                       |       |
|--------------------------|-----|-------------------------------------------------------------------------------------------------------|-------|
|                          | 22a | Implications for progression from pilot to future definitive trial, including any proposed amendments | 31/32 |
| <b>Other information</b> |     |                                                                                                       |       |
| Registration             | 23  | Registration number for pilot trial and name of trial registry                                        | 9     |
| Protocol                 | 24  | Where the pilot trial protocol can be accessed, if available                                          | 9     |
| Funding                  | 25  | Sources of funding and other support (such as supply of drugs), role of funders                       | 33    |
|                          | 26  | Ethical approval or approval by research review committee, confirmed with reference number            | 8     |

## Supplementary material 5: schedule for qualitative interviews

### Interview schedule

The researcher will be introduced as, a student from the University of Edinburgh, interested in their views and experiences of using the intervention. To open the interview participants will be initially asked about their concussion and or/use of health apps. The list of topics asked to participants includes;

1. Would you tell me a little about your concussion? Where/when it happened?
2. What impact on your daily life, if any, did your concussion have?
3. What was your experience of using the HeadOn Web application?
4. If you didn't use the intervention, why not?
  - a. Did they use any other services /seek out any information from other sources?
  - b. Is there anything that may have helped or encouraged you to use
  - c. If your symptoms hadn't improved would you have used the intervention
5. If you did use the intervention, when and how they used the intervention
6. how easy or not easy they found the intervention to use
7. likes and dislikes about the intervention
8. the functions/features were most useful and least useful?
9. what changes they would make within the intervention?



**Supplementary material 6: Consolidated criteria for reporting qualitative studies (COREQ)**

| <b>No. Item</b>                                | <b>Guide questions/description</b>                                                                                                                       | <b>Reported on Page #</b> |
|------------------------------------------------|----------------------------------------------------------------------------------------------------------------------------------------------------------|---------------------------|
| <b>Domain 1: Research team and reflexivity</b> |                                                                                                                                                          |                           |
| <i>Personal Characteristics</i>                |                                                                                                                                                          |                           |
| 1. Interviewer/facilitator                     | Which author/s conducted the interview or focus group?                                                                                                   | Page 9                    |
| 2. Credentials                                 | What were the researcher's credentials? E.g. PhD, MD                                                                                                     | Page 9                    |
| 3. Occupation                                  | What was their occupation at the time of the study?                                                                                                      | Page 9                    |
| 4. Gender                                      | Was the researcher male or female?                                                                                                                       | Page 9                    |
| 5. Experience and training                     | What experience or training did the researcher have?                                                                                                     | Page 9                    |
| <i>Relationship with participants</i>          |                                                                                                                                                          |                           |
| 6. Relationship established                    | Was a relationship established prior to study commencement?                                                                                              | Page 9                    |
| 7. Participant knowledge of the interviewer    | What did the participants know about the researcher? e.g. personal goals, reasons for doing the research                                                 | Page 9                    |
| 8. Interviewer characteristics                 | What characteristics were reported about the interviewer/facilitator? e.g. Bias, assumptions, reasons and interests in the research topic                | Page 9                    |
| <b>Domain 2: study design</b>                  |                                                                                                                                                          |                           |
| <i>Theoretical framework</i>                   |                                                                                                                                                          |                           |
| 9. Methodological orientation and Theory       | What methodological orientation was stated to underpin the study? e.g. grounded theory, discourse analysis, ethnography, phenomenology, content analysis | Page 10                   |
| <i>Participant selection</i>                   |                                                                                                                                                          |                           |
| 10. Sampling                                   | How were participants selected? e.g. purposive, convenience, consecutive, snowball                                                                       | Page 9                    |
| 11. Method of approach                         | How were participants approached? e.g. face-to-face, telephone, mail, email                                                                              | Page 9                    |
| 12. Sample size                                | How many participants were in the study?                                                                                                                 | Page 9 and Table 4        |
| 13. Non-participation                          | How many people refused to participate or dropped out? Reasons?                                                                                          | Supplementary figure 2    |

|                                        |                                                                                                                                 |                                                                 |
|----------------------------------------|---------------------------------------------------------------------------------------------------------------------------------|-----------------------------------------------------------------|
| <i>Setting</i>                         |                                                                                                                                 |                                                                 |
| 14. Setting of data collection         | Where was the data collected? e.g. home, clinic, workplace                                                                      | Page 9                                                          |
| 15. Presence of non-participants       | Was anyone else present besides the participants and researchers?                                                               | No – page 9                                                     |
| 16. Description of sample              | What are the important characteristics of the sample? e.g. demographic data, date                                               | Table 4                                                         |
| <i>Data collection</i>                 |                                                                                                                                 |                                                                 |
| 17. Interview guide                    | Were questions, prompts, guides provided by the authors? Was it pilot tested?                                                   | Supplementary material 4                                        |
| 18. Repeat interviews                  | Were repeat inter views carried out? If yes, how many?                                                                          | No                                                              |
| 19. Audio/visual recording             | Did the research use audio or visual recording to collect the data?                                                             | Yes – page 9                                                    |
| 20. Field notes                        | Were field notes made during and/or after the interview or focus group?                                                         | n/a                                                             |
| 21. Duration                           | What was the duration of the interviews or focus group?                                                                         | Page 9                                                          |
| 22. Data saturation                    | Was data saturation discussed?                                                                                                  | Yes - Page 10                                                   |
| 23. Transcripts returned               | Were transcripts returned to participants for comment and/or correction?                                                        | No                                                              |
| <b>Domain 3: analysis and findings</b> |                                                                                                                                 |                                                                 |
| <i>Data analysis</i>                   |                                                                                                                                 |                                                                 |
| 24. Number of data coders              | How many data coders coded the data?                                                                                            | One - CD                                                        |
| 25. Description of the coding tree     | Did authors provide a description of the coding tree?                                                                           | n/a                                                             |
| 26. Derivation of themes               | Were themes identified in advance or derived from the data?                                                                     | Derived from data and mapped onto pre-defined domains – page 21 |
| 27. Software                           | What software, if applicable, was used to manage the data?                                                                      | NVivo – page 10                                                 |
| 28. Participant checking               | Did participants provide feedback on the findings?                                                                              | No                                                              |
| <i>Reporting</i>                       |                                                                                                                                 |                                                                 |
| 29. Quotations presented               | Were participant quotations presented to illustrate the themes/findings? Was each quotation identified? e.g. participant number | Supplementary table 5                                           |

|                                  |                                                                        |            |
|----------------------------------|------------------------------------------------------------------------|------------|
|                                  |                                                                        |            |
| 30. Data and findings consistent | Was there consistency between the data presented and the findings?     | Yes        |
| 31. Clarity of major themes      | Were major themes clearly presented in the findings?                   | Table 5    |
| 32. Clarity of minor themes      | Is there a description of diverse cases or discussion of minor themes? | Page 23/24 |
